# Supplementary material for: The impact of frailty on survival in elderly intensive care patients with COVID-19: the COVIP study
Source: Springer Nature journal article supplement (doi:10.1186/s13054-021-03551-3), 2021-04-19
Supplement: MOESM2 [file 19083362]

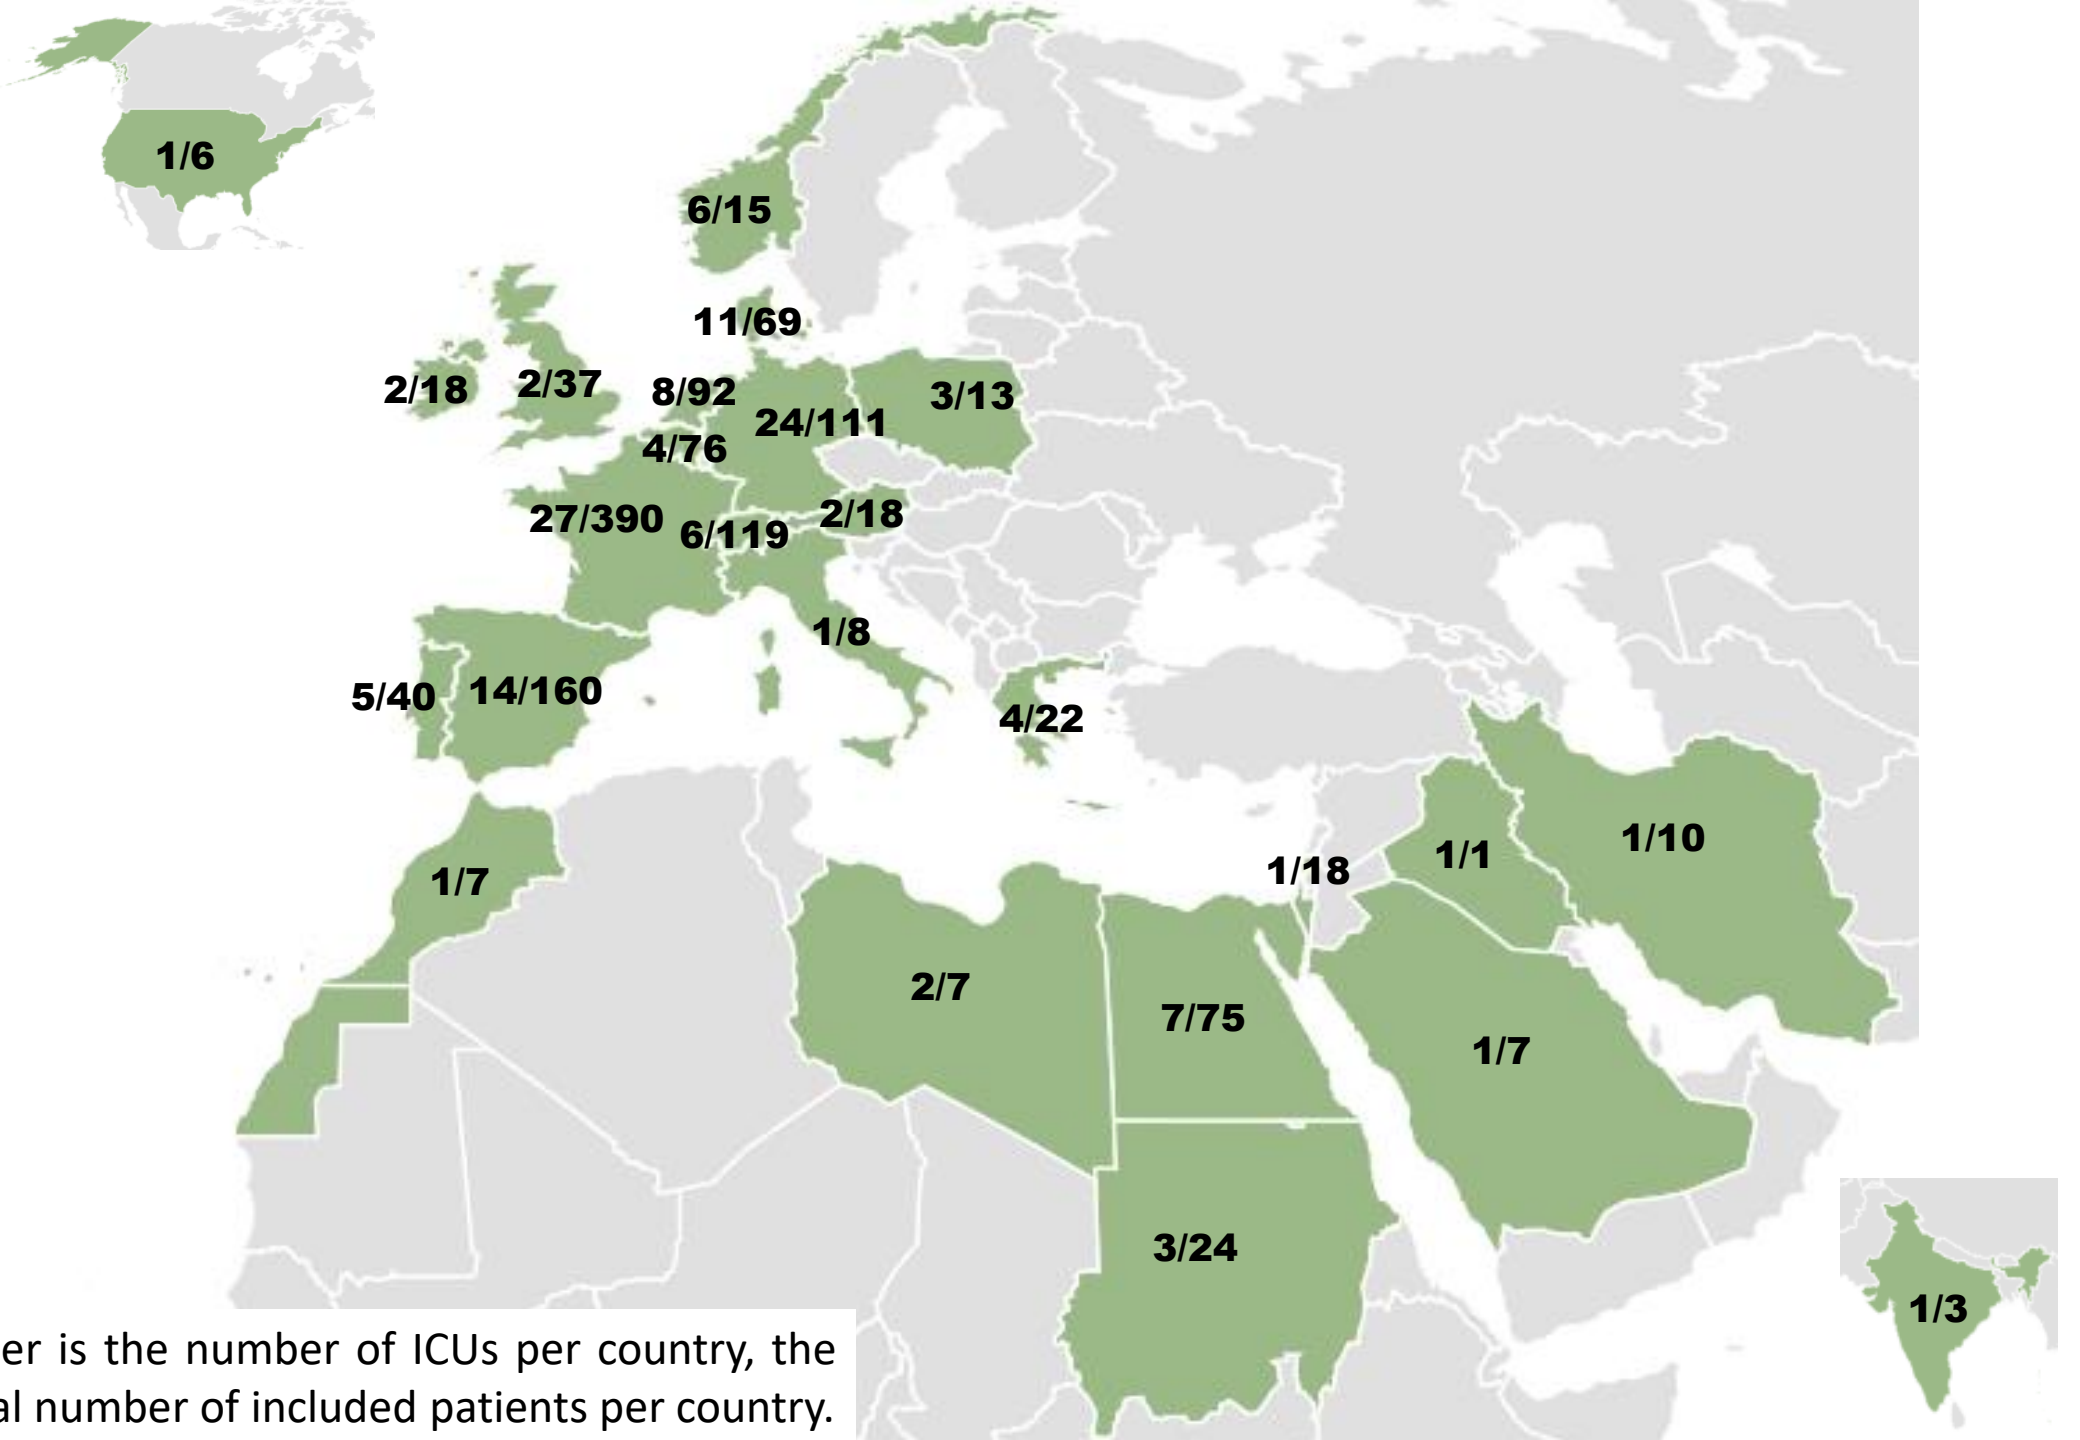

The first number is the number of ICUs per country, the second the total number of included patients per country.
