# Supplementary material for: The impact of frailty on survival in elderly intensive care patients with COVID-19: the COVIP study
Source: Springer Nature journal article supplement (doi:10.1186/s13054-021-03551-3), 2021-04-19

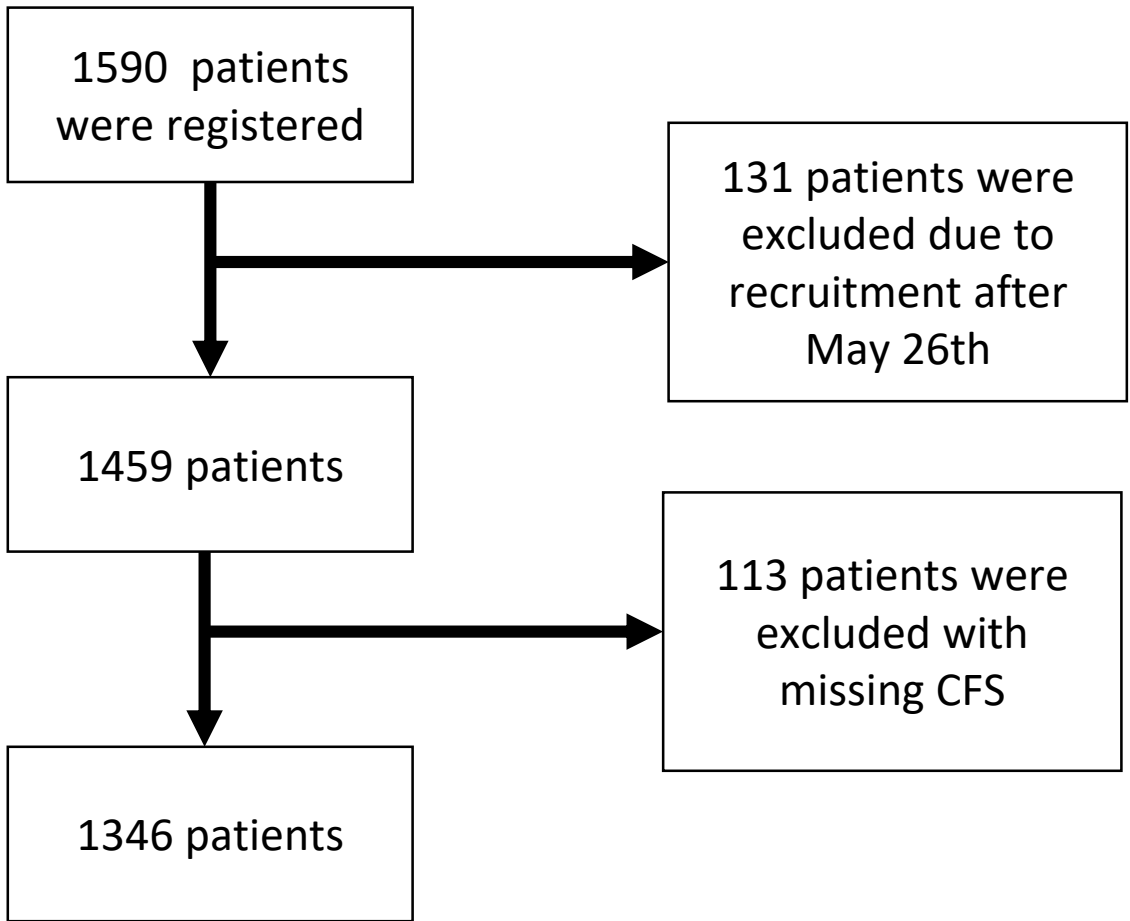

Supplement: MOESM6 [file 19083362]
