# Supplementary material for: The impact of frailty on survival in elderly intensive care patients with COVID-19: the COVIP study
Source: Springer Nature journal article supplement (doi:10.1186/s13054-021-03551-3), 2021-04-19
Supplement: MOESM7 [file 19083362]

Kaplan-Meier curve illustrating survival dependent on clinical frailty scale (CFS)

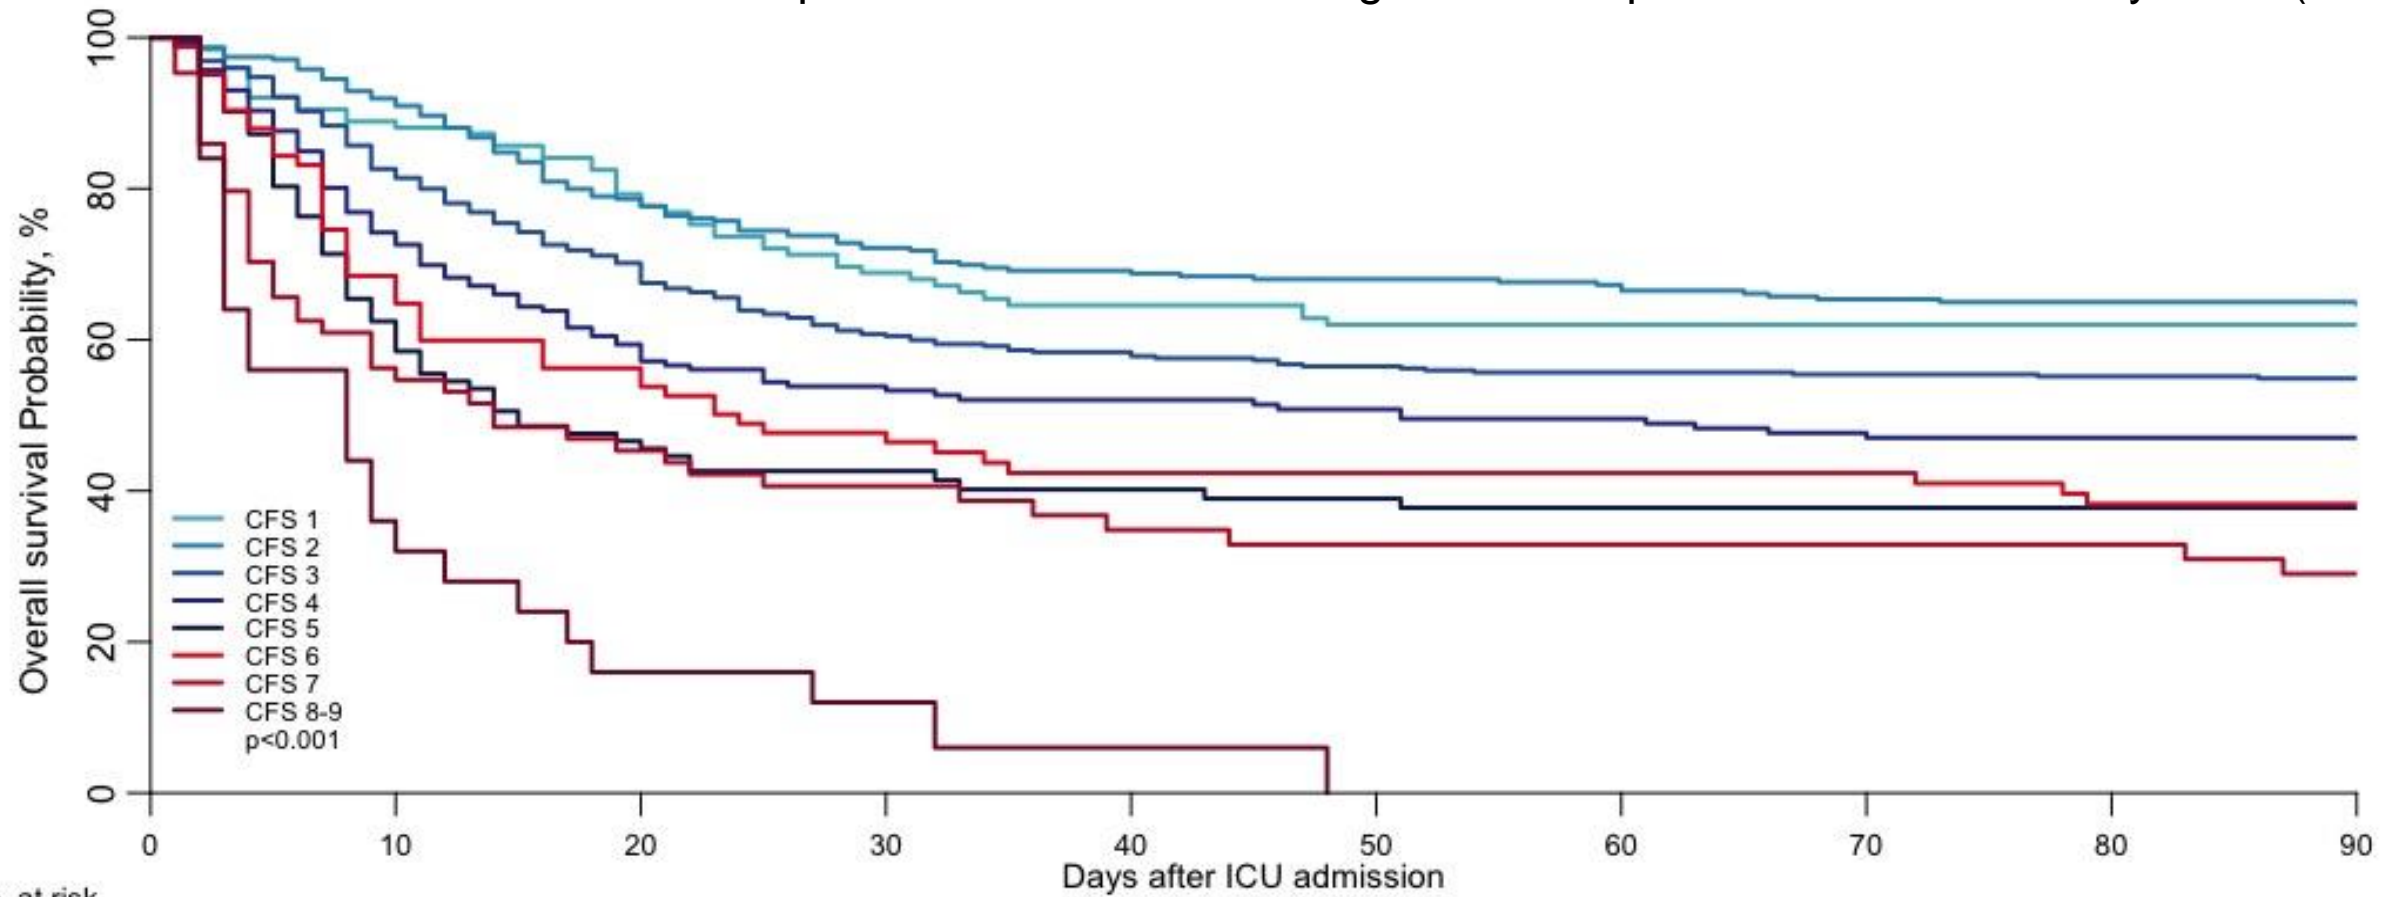

| No. at risk |     | 0   | 10  | 20  | 30  | 40  | 50  | 60  | 70  | 80  | 90  |
|-------------|-----|-----|-----|-----|-----|-----|-----|-----|-----|-----|-----|
| CFS 1       | 126 | 111 | 99  | 86  | 75  | 72  | 72  | 72  | 72  | 72  | 72  |
| CFS 2       | 311 | 284 | 242 | 222 | 184 | 179 | 177 | 172 | 171 | 171 | 171 |
| CFS 3       | 421 | 346 | 291 | 251 | 218 | 211 | 208 | 207 | 206 | 206 | 205 |
| CFS 4       | 189 | 138 | 107 | 97  | 84  | 81  | 79  | 76  | 75  | 75  | 75  |
| CFS 5       | 103 | 63  | 47  | 43  | 33  | 32  | 31  | 31  | 31  | 31  | 31  |
| CFS 6       | 83  | 56  | 46  | 39  | 31  | 31  | 31  | 31  | 28  | 28  | 28  |
| CFS 7       | 64  | 36  | 29  | 26  | 18  | 17  | 17  | 17  | 17  | 17  | 15  |
| CFS 8-9     | 25  | 9   | 4   | 3   | 1   | 0   | 0   | 0   | 0   | 0   | 0   |
